# Supplementary material
Source: publisher figshare collection journal article supplement (https://acs.figshare.com/ndownloader/files/14541407)
Supplement: Supplementary file 1 [file 14541407]

## Supporting Information

### Heats of Adsorption of N<sub>2</sub>, CO, Ar and CH<sub>4</sub> versus Coverage on the Zr-Based MOF NU-1000: Measurements and DFT Calculations

Graeme O. Vissers<sup>+</sup>, Wei Zhang<sup>+</sup>, Oscar E. Vilches<sup>#</sup>, Wei-Guang Liu<sup>‡</sup>, Haoyu S. Yu<sup>‡</sup>,  
Donald G. Truhlar<sup>‡</sup>, and Charles T. Campbell<sup>+\*</sup>

<sup>+</sup> Department of Chemistry, University of Washington, Seattle WA 98195-1700

<sup>#</sup> Department of Physics, University of Washington, Seattle WA, 98195-1560

<sup>‡</sup> Department of Chemistry, University of Minnesota, Minneapolis, MN 55455-0431

\* Corresponding author: [charliec@uw.edu](mailto:charliec@uw.edu)

#### S1. Table of Contents

| Contents                                                                 | Page |
|--------------------------------------------------------------------------|------|
| S2. Gases used                                                           | S-1  |
| S3. Nitrogen isotherm and BET plot on Sample 8 of NU-1000 at 77 K        | S-2  |
| S4. Adsorption isotherms of N <sub>2</sub> , CO, Ar, and CH <sub>4</sub> | S-2  |
| S4(a). N <sub>2</sub> isotherms                                          | S-3  |
| S4(b). CO isotherms                                                      | S-3  |
| S4(c). Ar isotherms                                                      | S-4  |
| S4(d). CH <sub>4</sub> isotherms                                         | S-4  |

#### S2. Gases used

N<sub>2</sub>: Praxair, Grade 4.8

CO: Linde, Grade 3.0, 99.9%

Ar: US Airgas, minimum purity 4.8

CH<sub>4</sub>: Praxair, Grade 3.7 UH, 99.97%

### S3. N<sub>2</sub> adsorption isotherm and BET plot on Sample 8 of NU-1000 at 77 K

All our NU-1000 samples were synthesized at Northwestern University and given to us by J. T. Hupp and O. K. Farha, as described in reference #1 of the main text. Sample 8 was accurately measured to have a mass of 10.3 mg before baking it to 75 °C.

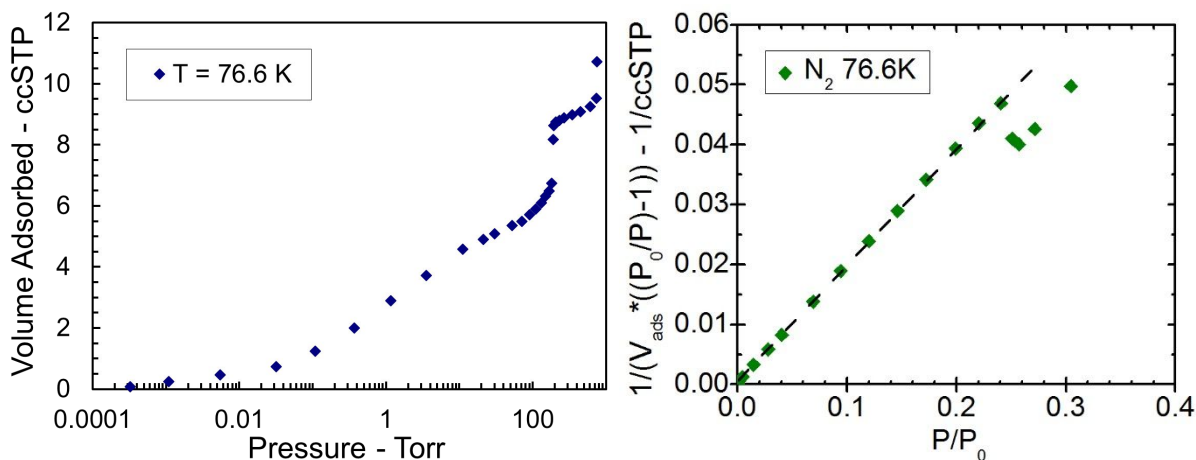

**Figure S1.** Left: N<sub>2</sub> equilibrium adsorption isotherm on Sample 8 of NU-1000 measured at approximately 77 K in the cryocooler system after baking for several hours at 75 °C and 10<sup>-6</sup> Torr. Right: BET plot of this same N<sub>2</sub> isotherm. Here,  $V_{\text{ads}}$  is the volume of gas adsorbed (if measured at STP),  $P$  is the pressure and  $P_0$  is the equilibrium vapor pressure of the bulk liquid at the measurement temperature. The BET linearized best-fit equation shown gives  $V_{\text{ML}} = 5.11$  ccSTP. This value was used to scale coverages to those of Sample 6 for which  $V_{\text{ML}} = 4.7$  ccSTP (i.e., ~8% smaller sample size).

### S4. Adsorption isotherms of N<sub>2</sub>, CO, Ar, and CH<sub>4</sub>

Two different approaches were used to measure adsorption isotherms of N<sub>2</sub>, CO, Ar, and CH<sub>4</sub> (see Figure S2 – S5). By keeping the temperature constant, a complete N<sub>2</sub> isotherm was measured up to the equilibrium vapor pressure of the bulk liquid at the measurement temperature (see Figure S1 left). To map the low-coverage and low-pressure region and check reproducibility after a certain amount was adsorbed, a different approach was also used to measure the isotherms for the four gases. In this approach, the temperature was regularly lowered or raised in approximately 5 K steps by keeping the coverage constant.

### S4(a). N<sub>2</sub> isotherms

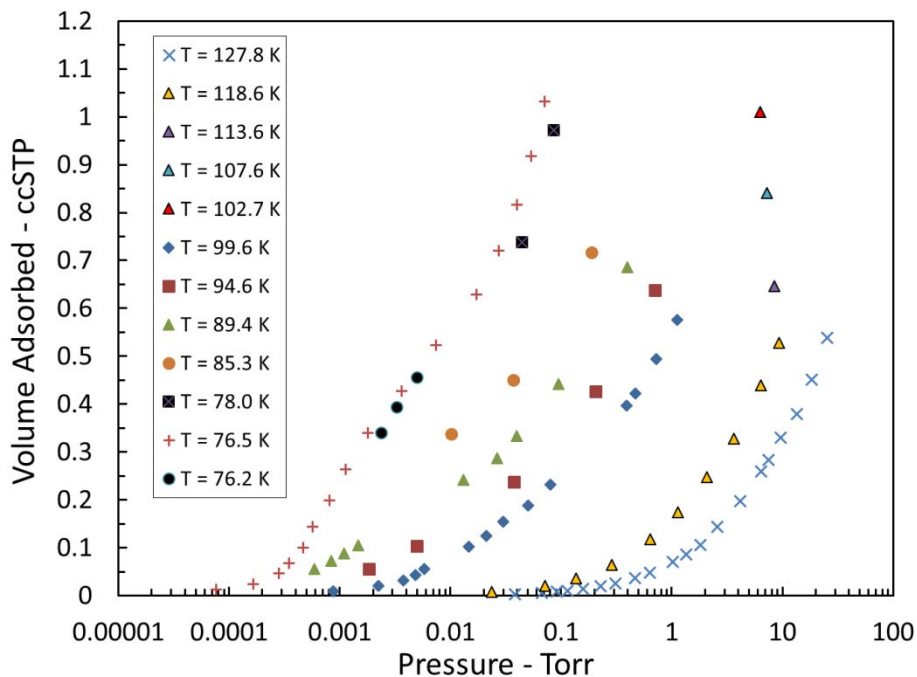

**Figure S2.** The N<sub>2</sub> adsorption isotherms on NU-1000 measured at the temperatures indicated in the inset. Only the data above 0.01 Torr and 98 K were used to calculate  $Q_{st}$  versus coverage.

### S4(b). CO isotherms

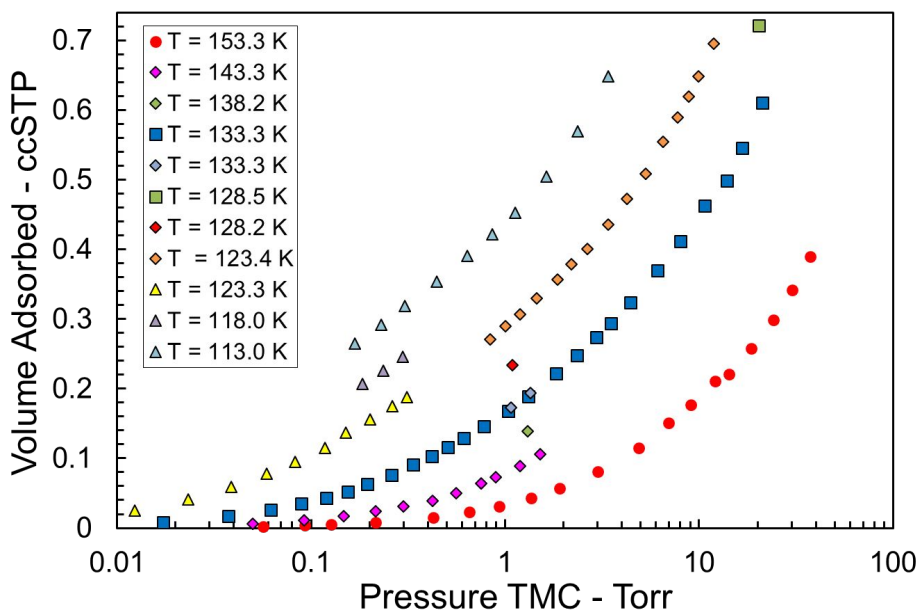

**Figure S3.** The CO adsorption isotherms on NU-1000 measured at the temperatures indicated in the inset.

**S4(c). Ar isotherms**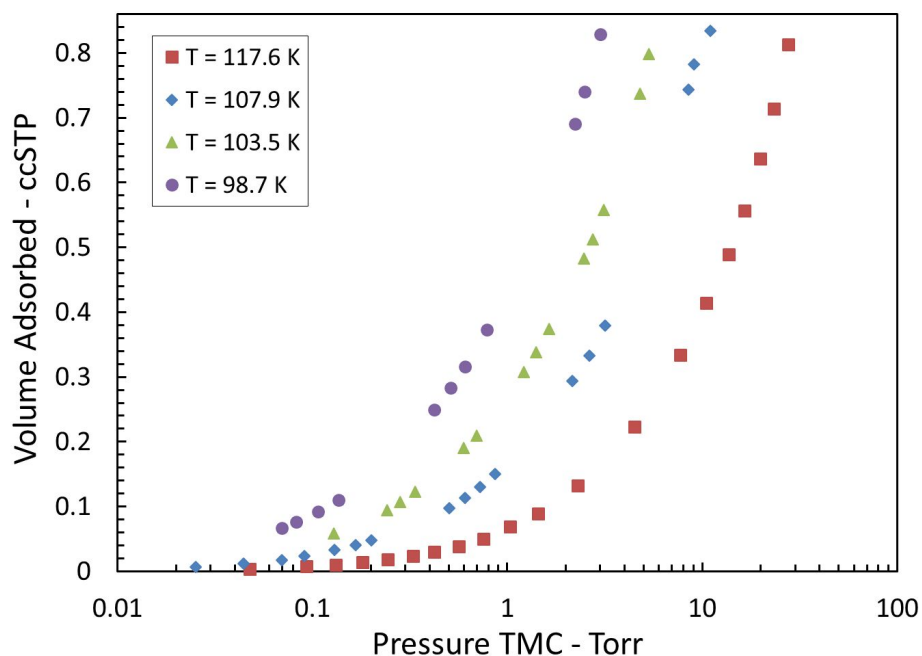

**Figure S4.** The Ar adsorption isotherms on NU-1000 measured at the temperatures indicated in the inset.

**S4(d). CH<sub>4</sub> isotherms**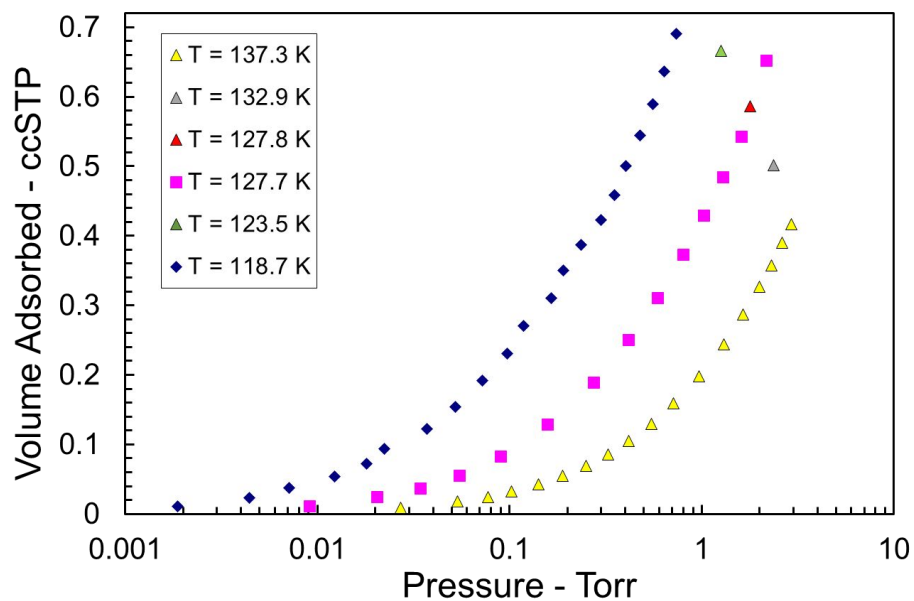

**Figure S5.** The CH<sub>4</sub> adsorption isotherms on NU-1000 measured at the temperatures indicated in the inset.
